# Supplementary material
Source: PubMed Central journal article supplement (PMC4483986)
Supplement: ijcem0008-5388-f5.pdf [file ijcem0008-5388-f5.pdf]

## CCR6 and risk of rheumatoid arthritis

**Table S1.** Detailed criteria for assessing study quality of case-control studies

| Criteria                                                                   | Score |
|----------------------------------------------------------------------------|-------|
| <b>Selection</b>                                                           |       |
| Is the case definition adequate?                                           |       |
| Yes, with independent validation                                           | 2     |
| Yes, eg medical record linkage or based on self-reports                    | 1     |
| No description                                                             | 0     |
| Representativeness of the Cases                                            |       |
| Consecutive or obviously representative series of cases                    | 1     |
| Potential for selection biases or not stated                               | 0     |
| Selection of Controls                                                      |       |
| Community controls                                                         | 2     |
| Hospital controls                                                          | 1     |
| No description                                                             | 0     |
| Definition of Controls                                                     |       |
| No history of RA                                                           | 1     |
| No description of source                                                   | 0     |
| <b>Comparability</b>                                                       |       |
| Comparability of cases and controls on the basis of the design or analysis |       |
| Study controls for any confounding risk factors                            | 1     |
| Study controls for no confounding risk factors                             | 0     |
| <b>Exposure</b>                                                            |       |
| Same method of ascertainment for cases and controls                        |       |
| Yes                                                                        | 1     |
| No                                                                         | 0     |
